# Supplementary material for: Implementation of a Rapid RT-LAMP Saliva-Based SARS-CoV-2 Testing Program in the Workplace
Source: MDPI journal article supplement (doi:10.3390/diagnostics12020474), 2022-02-12
Supplement: s1 [file s1]

**Supplementary Materials for: Implementation of a Rapid RT-LAMP Saliva-based SARS-CoV-2  
Testing Program in the Workplace**

Bradley W.M. Cook <sup>1\*</sup>, Kaitlyn Kobasa <sup>1,†</sup>, Marielou Tamayo <sup>1,†</sup>, Natasha Theriault <sup>1,2,†</sup>, Diane Gordon  
Pappas <sup>1</sup>, Steven S. Theriault <sup>1,2</sup>.

**Supplementary Materials**

Table S1: Primer Sets For RT-LAMP Assay and Nucleotide Changes Observed in Variants.

Table S2: GISAID Sequences Used in Study.

## Supplementary Tables:

**Table S1: Primer Sets For RT-LAMP Assay and Nucleotide Changes Observed in Variants.**

| Primer Set | Primer Name | Primer Sequence (5'-3')                                     | Alpha                                                                           | Beta                                                                                                    | Gamma                                                                   | Delta                                           |
|------------|-------------|-------------------------------------------------------------|---------------------------------------------------------------------------------|---------------------------------------------------------------------------------------------------------|-------------------------------------------------------------------------|-------------------------------------------------|
| AS1E       | F3          | CGGTGGACAAATTGTCAC                                          | NC                                                                              | NC                                                                                                      | NC                                                                      | NC                                              |
|            | B3          | CTTCTCTGGATTTAACACACTT                                      | NC                                                                              | NC                                                                                                      | NC                                                                      | NC                                              |
|            | Loop F      | TTACAAGCTTAAAGAATGTCTGAA<br>CACT                            | NC                                                                              | NC                                                                                                      | NC                                                                      | NC                                              |
|            | Loop B      | TTGAATTTAGGTGAAACATTTGTCA<br>CG                             | NC                                                                              | NC                                                                                                      | NC                                                                      | NC                                              |
|            | FIP         | TCAGCACACAAAGCCAAAAATTTA<br>TTTTTCTGTGCAAAGGAAATTAAG<br>GAG | NC                                                                              | NC                                                                                                      | NC                                                                      | NC                                              |
|            | BIP         | TATTGGTGGAGCTAAACTTAAAGC<br>CTTTTCTGTACAATCCCTTTGAGTG       | NC                                                                              | NC                                                                                                      | NC                                                                      | NC                                              |
| N2         | F3          | CGGCAGTCAAGCCTCTTC                                          | NC                                                                              | NC                                                                                                      | NC                                                                      | NC                                              |
|            | B3          | TTGCTCTCAAGCTGGTTCAA                                        | NC                                                                              | NC                                                                                                      | NC                                                                      | NC                                              |
|            | Loop F      | This primer was omitted from the set.<br>(Yang et al. 2020) | NA                                                                              | NA                                                                                                      | NA                                                                      | NA                                              |
|            | Loop B      | ATGGCGGTGATGCTGCTCTT                                        | NC                                                                              | NC                                                                                                      | NC                                                                      | 1 (G-->T <sup>*</sup> )<br>ATGGCTGTGATGCTGCTCTT |
|            | FIP         | TCCCCTACTGCTGCCTGGAGCGTTC<br>CTCATCACGTAGTCG                | 3 (CCC-->GTT <sup>*</sup> )<br>TCGTTTACTGCTGC<br>CTGGAGCGTTCTT<br>CATCACGTAGTCG | 5 (CCC -->GTT <sup>*</sup> , CT-->GA <sup>*</sup> )<br>TCGTTTAGAGCTGCCTGG<br>AGCGTTCCTCATCACGTA<br>GTCG | 1 (C-->A <sup>*</sup> )<br>TCCCATACTGCTGCCTGGAGCGTT<br>CCTCATCACGTAGTCG |                                                 |
|            | BIP         | TCTCCTGCTAGAATGGCTGGCATCT<br>GTCAAGCAGCAGCAAAG              | NC                                                                              | NC                                                                                                      | NC                                                                      | NC                                              |
| ORF1e      | F3          | GGCTAACTAACATCTTTGGC                                        | 1 (C-->T <sup>*</sup> )<br>GGCTAACTAATAT<br>CTTTGGC                             | NC                                                                                                      | NC                                                                      | NC                                              |
|            | B3          | GTCAGCACACAAAGCCAA                                          | NC                                                                              | NC                                                                                                      | NC                                                                      | NC                                              |
|            | Loop F      | TCTTCAAGCCAATCAAGGAC                                        | NC                                                                              | NC                                                                                                      | NC                                                                      | NC                                              |
|            | Loop B      | TTGTCGGTGGACAAATTGT                                         | NC                                                                              | NC                                                                                                      | NC                                                                      | NC                                              |
|            | FIP         | TCTCTAAGAACTCTACACCTTCCT<br>TTTTACTGTTTATGAAAACTCAAA<br>CC  | NC                                                                              | NC                                                                                                      | NC                                                                      | NC                                              |
|            | BIP         | TATCTCAACCTGTGCTTGTAATTT<br>TTAGAATGTCTGAACACTCTCCT         | NC                                                                              | NC                                                                                                      | NC                                                                      | NC                                              |
| RNase P    | F3          | TTGATGAGCTGGAGCCA                                           |                                                                                 |                                                                                                         |                                                                         |                                                 |
|            | B3          | CACCCTCAATGCAGAGTC                                          |                                                                                 |                                                                                                         |                                                                         |                                                 |
|            | Loop F      | ATGTGGATGGCTGAGTTGTT                                        |                                                                                 |                                                                                                         |                                                                         |                                                 |
|            | Loop B      | CATGCTGAGTACTGGACCTC                                        |                                                                                 |                                                                                                         |                                                                         |                                                 |

|  |     |                                               |  |
|--|-----|-----------------------------------------------|--|
|  | FIP | GTGTGACCCTGAAGACTCGGTTTT<br>AGCCACTGACTCGGATC |  |
|--|-----|-----------------------------------------------|--|

\* Change observed in variant

## Supplementary Tables:

**Table S2: GISAID Sequences Used in Study.**

| Variant | Isolate                                  | Accession ID    | Collection Date | Submission Date |
|---------|------------------------------------------|-----------------|-----------------|-----------------|
| Alpha   | hCoV-<br>19/Canada/MB-<br>NML-16346/2021 | EPI_ISL_1594283 | 2021-01-21      | 2021-04-15      |
| Beta    | hCoV-<br>19/Canada/MB-<br>NML-17441/2021 | EPI_ISL_1594098 | 2021-01-16      | 2021-04-15      |
| Gamma   | hCoV-<br>19/Canada/MB-<br>NML-34961/2021 | EPI_ISL_1594071 | 2021-03-31      | 2021-04-15      |
| Delta   | hCoV-<br>19/Canada/MB-<br>NML-70550/2021 | EPI_ISL_2495627 | 2021-04-29      | 2021-06-11      |

All samples were collected from MB-Cadham Laboratory and submitted by the National Microbiology Laboratory (NML) in North America, Canada, Manitoba by: Anna Majer; Anneliese Landgraff; CanCOGeN's metadata curation team; Darian Hole; David Alexander; Elsie Grudeski; Gary Van Domselaar; Grace Seo; Jared Bullard; Jennifer Tanner; Kerry Dust; Kirsten Biggar; Madison Chapel; Morag Graham; Natalie Knox; Nathalie Bastien; Paul Van Caesele; Philip Mabon; Public Health Agency of Canada CanCOGeN team; Rhiannon Huzarewich; Russell Mandes; Shari Tyson; Timothy Booth; Yan Li.
